# Supplementary material for: Upregulated expression of pyruvate kinase M2 mRNA predicts poor prognosis in lung adenocarcinoma
Source: PeerJ. 2020 Feb 20;8:e8625. doi: 10.7717/peerj.8625 (PMC7036274; doi:10.7717/peerj.8625)
Supplement: Supplemental Information 2 [file peerj-08-8625-s002.xlsx]

## Sheet: Sheet1
# region type = gene
# region name = PKM2
# region coordinates = chr15:72199029-72231822
data_type	tcga_44_6147_01	tcga_55_a4dg_01	tcga_44_6775_01	tcga_44_3917_01	tcga_44_3918_01	tcga_l9_a7sv_01	tcga_44_6146_01	tcga_44_2666_01	tcga_97_7546_01	tcga_44_2659_01	tcga_86_8359_01	tcga_55_6981_11	tcga_44_5645_01	tcga_44_6778_11	tcga_86_a4p8_01	tcga_50_6595_11	tcga_55_6970_11	tcga_91_6831_11	tcga_55_6986_11	tcga_44_2656_01	tcga_44_6776_11	tcga_nj_a55a_01	tcga_49_6744_11	tcga_55_6972_11	tcga_91_6840_01	tcga_50_5939_11	tcga_99_aa5r_01	tcga_44_a479_01	tcga_50_5936_11	tcga_j2_a4ae_01	tcga_55_6982_11	tcga_55_6975_11	tcga_55_6978_11	tcga_50_5931_11	tcga_44_6147_11	tcga_97_8172_01	tcga_55_8097_01	tcga_55_6985_11	tcga_64_5779_01	tcga_55_6971_11	tcga_55_6980_11	tcga_67_4679_01	tcga_49_6761_11	tcga_91_6849_11	tcga_55_6969_11	tcga_62_a46r_01	tcga_86_a4p7_01	tcga_50_5935_11	tcga_44_2655_11
cnv	-1	-1	-1	-1	-1	-1	0	0	-1	-1	-1	null	1	null	0	null	null	null	null	-1	null	0	null	null	-1	null	0	0	null	0	null	null	null	null	null	-1	0	null	-1	null	null	0	null	null	null	-1	0	null	null
cg25228169	0.513	0.496	0.524	0.502	0.549	0.3	0.31	0.397	0.469	null	0.505	null	0.407	0.522	0.52	null	null	null	null	0.603	null	0.422	null	null	0.493	0.486	0.492	0.601	0.491	0.442	null	null	null	0.478	0.48	0.519	0.369	null	0.488	null	null	0.328	null	null	null	0.554	0.505	0.508	0.471
cg21511941	0.382	0.368	0.336	0.337	0.366	0.228	0.198	0.26	0.276	null	0.305	null	0.273	0.317	0.383	null	null	null	null	0.368	null	0.334	null	null	0.285	0.206	0.36	0.47	0.184	0.34	null	null	null	0.238	0.243	0.34	0.259	null	0.281	null	null	0.204	null	null	null	0.398	0.369	0.313	0.192
cg04098270	0.167	0.156	0.145	0.144	0.157	0.059	0.083	0.121	0.114	null	0.101	null	0.104	0.13	0.154	null	null	null	null	0.191	null	0.138	null	null	0.148	0.067	0.148	0.207	0.078	0.128	null	null	null	0.106	0.097	0.19	0.076	null	0.084	null	null	0.065	null	null	null	0.179	0.169	0.146	0.064
cg09234567	0.031	0.027	0.029	0.031	0.043	0.027	0.02	0.029	0.029	null	0.02	null	0.028	0.028	0.044	null	null	null	null	0.024	null	0.027	null	null	0.02	0.014	0.025	0.05	0.028	0.028	null	null	null	0.03	0.026	0.059	0.023	null	0.037	null	null	0.005	null	null	null	0.035	0.031	0.024	0.014
cg05036032	0.073	0.045	0.039	0.043	0.074	0.063	0.04	0.037	0.027	null	0.023	null	0.043	0.01	0.026	null	null	null	null	0.05	null	0.034	null	null	0.04	0.038	0.026	0.046	0.044	0.05	null	null	null	0.035	0.023	0.039	0.021	null	0.047	null	null	0.033	null	null	null	0.038	0.061	0.022	0.023
cg08885647	0.098	0.063	0.089	0.086	0.076	0.112	0.065	0.071	0.059	null	0.072	null	0.084	0.135	0.08	null	null	null	null	0.093	null	0.062	null	null	0.09	0.073	0.042	0.097	0.053	0.087	null	null	null	0.093	0.065	0.068	0.069	null	0.087	null	null	0.09	null	null	null	0.071	0.099	0.084	0.052
cg19687230	0.433	0.375	0.383	0.412	0.512	0.223	0.255	0.285	0.327	null	0.365	null	0.358	0.452	0.469	null	null	null	null	0.5	null	0.352	null	null	0.327	0.388	0.445	0.503	0.369	0.377	null	null	null	0.392	0.4	0.407	0.308	null	0.388	null	null	0.228	null	null	null	0.426	0.476	0.422	0.358
cg00635674	0.608	0.576	0.584	0.659	0.651	0.381	0.431	0.472	0.537	null	0.61	null	0.495	0.65	0.696	null	null	null	null	0.674	null	0.631	null	null	0.459	0.638	0.641	0.701	0.612	0.539	null	null	null	0.664	0.63	0.567	0.476	null	0.56	null	null	0.482	null	null	null	0.636	0.642	0.692	0.621
cg27032813	0.506	0.46	0.472	0.552	0.544	0.347	0.333	0.452	0.46	null	0.533	null	0.423	0.561	0.657	null	null	null	null	0.602	null	0.505	null	null	0.389	0.585	0.57	0.569	0.536	0.447	null	null	null	0.573	0.564	0.54	0.384	null	0.516	null	null	0.519	null	null	null	0.539	0.554	0.636	0.565
cg03224126	0.606	0.699	0.69	0.676	0.683	0.495	0.717	0.767	0.419	null	0.739	null	0.55	0.741	0.754	null	null	null	null	0.752	null	0.62	null	null	0.785	0.786	0.714	0.579	0.75	0.585	null	null	null	0.755	0.681	0.564	0.56	null	0.472	null	null	0.796	null	null	null	0.773	0.725	0.752	0.814
cg10401733	0.496	0.457	0.498	0.414	0.52	0.433	0.608	0.428	0.424	null	0.545	null	0.396	0.569	0.518	null	null	null	null	0.554	null	0.462	null	null	0.656	0.477	0.471	0.557	0.508	0.421	null	null	null	0.546	0.505	0.455	0.356	null	0.465	null	null	0.352	null	null	null	0.568	0.531	0.546	0.471
cg23893460	0.678	0.744	0.733	0.561	0.64	0.779	0.525	0.715	0.725	null	0.721	null	0.728	0.707	0.699	null	null	null	null	0.697	null	0.657	null	null	0.774	0.724	0.745	0.687	0.71	0.712	null	null	null	0.704	0.681	0.622	0.75	null	0.618	null	null	0.788	null	null	null	0.811	0.718	0.721	0.773
cg09485853	0.535	0.553	0.468	0.623	0.589	0.752	0.257	0.398	0.429	null	0.535	null	0.388	0.418	0.417	null	null	null	null	0.605	null	0.419	null	null	0.728	0.423	0.399	0.7	0.441	0.328	null	null	null	0.338	0.37	0.607	0.664	null	0.696	null	null	0.503	null	null	null	0.699	0.522	0.433	0.3
ch.15.1141100F	0.056	0.065	0.041	0.037	0.04	0.056	0.053	0.04	0.051	null	0.029	null	0.038	0.081	0.022	null	null	null	null	0.034	null	0.057	null	null	0.052	0.041	0.044	0.055	0.042	0.064	null	null	null	0.057	0.051	0.04	0.054	null	0.034	null	null	0.054	null	null	null	0.062	0.047	0.047	0.074
cg07565018	0.901	0.869	0.887	0.877	0.883	0.87	0.902	0.896	0.915	null	0.905	null	0.888	0.901	0.896	null	null	null	null	0.919	null	0.855	null	null	0.899	0.9	0.898	0.912	0.884	0.904	null	null	null	0.878	0.903	0.908	0.926	null	0.905	null	null	0.915	null	null	null	0.914	0.908	0.927	0.903
cg22234930	0.162	0.178	0.109	0.344	0.096	0.522	0.147	0.095	0.187	null	0.086	null	0.11	0.297	0.315	null	null	null	null	0.114	null	0.162	null	null	0.393	0.315	0.255	0.197	0.342	0.156	null	null	null	0.332	0.355	0.333	0.301	null	0.192	null	null	0.297	null	null	null	0.152	0.22	0.289	0.329
cg24327132	0.305	0.214	0.209	0.187	0.225	0.46	0.25	0.26	0.288	null	0.212	null	0.198	0.503	0.436	null	null	null	null	0.268	null	0.272	null	null	0.472	0.544	0.337	0.198	0.471	0.22	null	null	null	0.594	0.496	0.354	0.221	null	0.413	null	null	0.2	null	null	null	0.157	0.328	0.55	0.568
cg12433486	null	null	null	null	null	null	null	null	null	null	null	null	null	null	null	null	null	null	null	null	null	null	null	null	null	null	null	null	null	null	null	null	null	null	null	null	null	null	null	null	null	null	null	null	null	null	null	null	null
cg11028091	0.077	0.11	0.066	0.057	0.063	0.068	0.068	0.069	0.062	null	0.033	null	0.062	0.092	0.051	null	null	null	null	0.076	null	0.069	null	null	0.079	0.061	0.078	0.08	0.068	0.11	null	null	null	0.076	0.095	0.08	0.055	null	0.067	null	null	0.119	null	null	null	0.136	0.044	0.069	0.061
cg16892255	0.117	0.121	0.108	0.102	0.106	0.111	0.111	0.121	0.098	null	0.115	null	0.103	0.114	0.076	null	null	null	null	0.11	null	0.115	null	null	0.111	0.086	0.072	0.125	0.081	0.113	null	null	null	0.126	0.095	0.101	0.093	null	0.088	null	null	0.11	null	null	null	0.128	0.096	0.13	0.09
cg05888487	0.132	0.126	0.135	0.125	0.132	0.153	0.121	0.126	0.121	null	0.119	null	0.122	0.128	0.096	null	null	null	null	0.143	null	0.102	null	null	0.098	0.099	0.082	0.104	0.13	0.101	null	null	null	0.121	0.108	0.122	0.103	null	0.117	null	null	0.106	null	null	null	0.106	0.074	0.122	0.1
cg11471939	0.081	0.08	0.078	0.073	0.074	0.084	0.075	0.079	0.076	null	0.066	null	0.069	0.077	0.071	null	null	null	null	0.074	null	0.092	null	null	0.071	0.059	0.061	0.079	0.061	0.085	null	null	null	0.069	0.064	0.075	0.07	null	0.057	null	null	0.062	null	null	null	0.078	0.07	0.081	0.059
cg16940801	0.115	0.105	0.115	0.127	0.119	0.099	0.125	0.129	0.092	null	0.128	null	0.119	0.116	0.084	null	null	null	null	0.124	null	0.107	null	null	0.088	0.092	0.092	0.099	0.094	0.096	null	null	null	0.114	0.128	0.12	0.087	null	0.087	null	null	0.1	null	null	null	0.101	0.09	0.113	0.082
cg22171725	0.093	0.099	0.109	0.125	0.107	0.1	0.106	0.133	0.092	null	0.094	null	0.1	0.104	0.068	null	null	null	null	0.111	null	0.095	null	null	0.091	0.079	0.08	0.089	0.09	0.097	null	null	null	0.091	0.098	0.104	0.094	null	0.082	null	null	0.094	null	null	null	0.092	0.093	0.103	0.074
cg23160336	0.048	0.041	0.059	0.066	0.048	0.039	0.049	0.05	0.037	null	0.045	null	0.05	0.05	0.034	null	null	null	null	0.06	null	0.048	null	null	0.039	0.033	0.036	0.046	0.038	0.063	null	null	null	0.045	0.047	0.042	0.04	null	0.031	null	null	0.028	null	null	null	0.041	0.031	0.04	0.029
cg03989244	0.106	0.068	0.138	0.137	0.126	0.075	0.118	0.183	0.078	null	0.101	null	0.13	0.088	0.065	null	null	null	null	0.175	null	0.108	null	null	0.07	0.078	0.057	0.073	0.086	0.072	null	null	null	0.121	0.078	0.087	0.101	null	0.089	null	null	0.076	null	null	null	0.078	0.07	0.093	0.089
cg00171565	0.086	0.08	0.112	0.094	0.095	0.085	0.105	0.112	0.07	null	0.068	null	0.096	0.102	0.063	null	null	null	null	0.117	null	0.101	null	null	0.07	0.076	0.08	0.089	0.087	0.087	null	null	null	0.084	0.108	0.081	0.077	null	0.089	null	null	0.094	null	null	null	0.085	0.063	0.109	0.07
cg02358251	0.091	0.117	0.094	0.098	0.104	0.12	0.097	0.09	0.09	null	0.095	null	0.091	0.083	0.078	null	null	null	null	0.097	null	0.078	null	null	0.087	0.068	0.072	0.09	0.081	0.081	null	null	null	0.097	0.093	0.1	0.083	null	0.065	null	null	0.107	null	null	null	0.11	0.077	0.093	0.074
cg07151400	0.079	0.08	0.082	0.088	0.092	0.145	0.09	0.088	0.095	null	0.07	null	0.082	0.068	0.058	null	null	null	null	0.087	null	0.08	null	null	0.064	0.072	0.056	0.086	0.076	0.091	null	null	null	0.077	0.074	0.094	0.106	null	0.065	null	null	0.085	null	null	null	0.086	0.059	0.076	0.06
cg12359077	0.065	0.106	0.07	0.061	0.068	0.091	0.072	0.075	0.063	null	0.042	null	0.062	0.105	0.066	null	null	null	null	0.088	null	0.096	null	null	0.076	0.051	0.068	0.099	0.067	0.101	null	null	null	0.052	0.061	0.101	0.064	null	0.09	null	null	0.087	null	null	null	0.094	0.057	0.097	0.064
cg18951187	0.084	0.057	0.091	0.133	0.097	0.059	0.09	0.136	0.116	null	0.045	null	0.103	0.108	0.049	null	null	null	null	0.127	null	0.049	null	null	0.078	0.069	0.06	0.064	0.076	0.061	null	null	null	0.063	0.054	0.056	0.073	null	0.05	null	null	0.098	null	null	null	0.045	0.048	0.057	0.228
cg25016070	0.17	0.161	0.117	0.134	0.156	0.174	0.13	0.118	0.166	null	0.164	null	0.112	0.146	0.093	null	null	null	null	0.144	null	0.202	null	null	0.16	0.096	0.107	0.212	0.09	0.178	null	null	null	0.204	0.16	0.175	0.111	null	0.154	null	null	0.142	null	null	null	0.25	0.12	0.163	0.102
cg09651136	0.628	0.646	0.514	0.73	0.651	0.816	0.249	0.46	0.706	null	0.573	null	0.382	0.473	0.483	null	null	null	null	0.702	null	0.497	null	null	0.395	0.497	0.547	0.706	0.47	0.485	null	null	null	0.529	0.466	0.662	0.496	null	0.746	null	null	null	null	null	null	0.722	0.647	0.518	0.472
cg20663939	null	null	null	null	null	null	null	null	null	null	null	null	null	null	null	null	null	null	null	null	null	null	null	null	null	null	null	null	null	null	null	null	null	null	null	null	null	null	null	null	null	null	null	null	null	null	null	null	null
age_at_initial_pathologic_diagnosis	67	71	72	33	60	69	64	43	76	65	52	53	61	59	59	74	67	66	74	59	60	76	64	72	59	85	70	73	58	77	79	61	81	75	67	75	60	58	61	59	56	69	68	75	52	54	63	86	65
anatomic_neoplasm_subdivision	r-upper	r-upper	r-upper	r-upper	l-upper	l-lower	l-lower	r-upper	l-upper	null	l-lower	l-upper	l-upper	null	r-lower	r-upper	r-upper	r-middle	r-lower	r-upper	r-upper	r-lower	l-upper	r-upper	r-upper	r-upper	l-lower	r-upper	r-lower	l-upper	r-lower	l-lower	r-middle	l-upper	r-upper	r-upper	r-upper	l-upper	l-lower	l-lower	r-lower	r-lower	r-upper	l-upper	l-upper	l-lower	l-lower	l-upper	r-upper
anatomic_treatment_site	null	null	null	null	local recurrence	null	null	null	primary tumor field	null	null	primary tumor field	null	null	primary tumor field	primary tumor field	primary tumor field	null	null	null	null	null	null	null	null	null	null	null	null	null	distant recurrence	null	distant site	null	null	null	null	null	distant site	null	null	null	null	null	null	null	null	primary tumor field	null
dlco_predictive_percent	68	61	66	83	76	55	76	66	60	67	null	null	82	53	85	null	null	null	null	72	80	null	null	null	null	null	47	60	null	89	null	null	null	null	68	64.98	74	null	100	null	null	null	1	66	null	null	null	null	73
eastern_cancer_oncology_group	2	null	null	null	null	0	1	null	null	1	4	null	null	null	0	null	null	null	null	null	null	null	null	null	null	null	null	null	null	null	null	null	null	null	2	null	null	null	0	null	null	null	null	null	null	null	0	null	null
egfr_mutation_performed	null	null	null	null	null	no	null	null	null	null	null	no	null	null	yes	yes	no	null	no	null	null	no	null	no	null	null	yes	yes	yes	no	no	no	no	null	null	yes	no	no	null	no	no	no	null	yes	no	no	no	yes	null
egfr_mutation_result	null	null	null	null	null	null	null	null	null	null	null	null	null	null	null	null	null	null	null	null	null	null	null	null	null	null	null	null	null	null	null	null	null	null	null	null	null	null	null	null	null	null	null	null	null	null	null	other	null
histological_type	not otherwise specified (nos)	not otherwise specified (nos)	not otherwise specified (nos)	not otherwise specified (nos)	not otherwise specified (nos)	not otherwise specified (nos)	lung mucinous adenocarcinoma	not otherwise specified (nos)	lung acinr adenocarcinoma	not otherwise specified (nos)	not otherwise specified (nos)	not otherwise specified (nos)	not otherwise specified (nos)	not otherwise specified (nos)	not otherwise specified (nos)	not otherwise specified (nos)	lung papillary adenocarcinoma	not otherwise specified (nos)	lung bronchioloalveolar carcinoma nonmucinous	not otherwise specified (nos)	not otherwise specified (nos)	not otherwise specified (nos)	mixed subtype	lung papillary adenocarcinoma	not otherwise specified (nos)	mixed subtype	not otherwise specified (nos)	not otherwise specified (nos)	mucinous (colloid) carcinoma	not otherwise specified (nos)	not otherwise specified (nos)	mixed subtype	not otherwise specified (nos)	not otherwise specified (nos)	not otherwise specified (nos)	lung acinr adenocarcinoma	not otherwise specified (nos)	not otherwise specified (nos)	lung acinr adenocarcinoma	not otherwise specified (nos)	lung bronchioloalveolar carcinoma nonmucinous	not otherwise specified (nos)	not otherwise specified (nos)	not otherwise specified (nos)	not otherwise specified (nos)	mixed subtype	not otherwise specified (nos)	not otherwise specified (nos)	not otherwise specified (nos)
history_of_neoadjuvant_treatment	no	no	no	no	no	no	no	no	no	no	no	no	no	no	no	no	no	no	no	no	no	no	no	no	no	no	no	no	no	no	no	no	no	no	no	no	no	no	no	no	no	no	no	no	no	no	no	no	no
karnofsky_performance_score	null	null	null	null	null	null	null	null	null	null	20	null	null	null	null	null	null	null	null	null	null	null	null	null	null	null	null	null	null	null	null	null	null	null	null	null	null	null	null	null	null	null	null	null	null	100	100	null	null
kras_gene_analysis_performed	null	null	null	no	no	no	null	no	null	no	null	no	null	null	no	yes	no	no	no	no	null	no	yes	no	no	null	yes	no	yes	no	no	no	no	null	null	yes	no	no	null	no	no	no	null	no	no	no	no	yes	no
kras_mutation_found	null	null	null	null	null	null	null	null	null	null	null	null	null	null	null	null	null	null	null	null	null	null	yes	null	null	null	yes	null	yes	null	null	null	null	null	null	yes	null	null	null	null	null	null	null	null	null	null	null	yes	null
kras_mutation_result	null	null	null	null	null	null	null	null	null	null	null	null	null	null	null	null	null	null	null	null	null	null	null	null	null	null	g12c	null	g12c	null	null	null	null	null	null	g12v	null	null	null	null	null	null	null	null	null	null	null	null	null
location_in_lung_parenchyma	null	null	null	null	null	null	null	null	null	null	peripheral lung	null	null	null	null	null	null	null	null	null	null	null	null	null	null	null	null	null	null	null	null	null	null	central lung	null	null	null	null	central lung	null	null	central lung	null	null	null	central lung	peripheral lung	null	null
new_neoplasm_event_type	null	null	locoregionl recurrence	null	locoregionl recurrence	null	locoregionl recurrence	null	new primary tumor	null	null	null	null	null	null	distant metastasis	locoregionl recurrence	null	null	new primary tumor	null	null	null	null	null	null	null	new primary tumor	null	null	distant metastasis	null	null	distant metastasis	null	null	null	null	distant metastasis	null	null	null	null	null	null	null	null	null	new primary tumor
new_tumor_event_after_initial_treatment	no	no	no	no	no	no	null	no	yes	no	null	no	no	no	no	yes	yes	no	no	no	no	no	no	no	no	no	no	no	yes	no	yes	no	yes	yes	no	no	no	no	no	no	no	null	no	null	null	no	no	no	no
number_pack_years_smoked	null	100	25	16	20	93	15	30	25	57	36	null	5	15	null	null	null	null	null	23	45	25	20	null	50	15	46	40	null	null	null	null	null	40	null	20	35	50	40	60	null	null	50	30	null	25	null	null	30
pathologic_m	m0	mx	mx	m0	m0	m0	m0	m0	mx	m0	m0	m0	null	mx	mx	m0	mx	mx	m0	m0	mx	m0	mx	m0	m0	m0	m0	mx	m0	mx	m0	m0	mx	m0	m0	m0	mx	mx	m0	mx	m0	m0	mx	mx	m0	m0	m0	m0	m0
pathologic_n	nx	n0	n0	n0	n0	n1	n0	n0	n0	n1	n2	n2	nx	n0	n2	n2	n2	n0	n0	n0	n0	n0	n1	n0	n0	n0	n0	n0	n2	n0	n1	n1	n0	n0	nx	n0	n0	n0	n2	n0	n0	n0	n2	n2	n0	n0	n0	n0	n0
pathologic_t	t1b	t1b	t2a	t2	t1	t2a	t3	t2	t1	t1	t3	t1	t1	t1	t1b	t2	t2	t2	t2	t2	t1	t2	t2a	t2	t1b	t2	t1a	t2	t2	t1a	t2	t2	t2b	t2	t1b	t2a	t1a	t2	t2	t2	t1	t3	t1	t2	t2	t2	t2a	t1	t1
performance_status_scale_timing	other	null	null	null	null	preoperative	adjuvant therapy	null	null	adjuvant therapy	post-adjuvant therapy	null	null	null	post-adjuvant therapy	null	null	null	null	null	null	null	null	null	null	null	null	null	null	null	null	null	null	null	other	null	null	null	post-adjuvant therapy	null	null	null	null	null	null	preoperative	other	null	null
person_neoplasm_cancer_status	tumor free	tumor free	tumor free	tumor free	tumor free	tumor free	tumor free	with tumor	with tumor	tumor free	null	tumor free	tumor free	tumor free	tumor free	with tumor	with tumor	tumor free	tumor free	tumor free	tumor free	tumor free	tumor free	tumor free	tumor free	tumor free	null	tumor free	with tumor	tumor free	with tumor	with tumor	with tumor	with tumor	tumor free	tumor free	tumor free	tumor free	null	tumor free	tumor free	tumor free	null	null	tumor free	tumor free	tumor free	tumor free	tumor free
post_bronchodilator_fev1_fvc_percent	null	null	89	null	null	40	95	null	96	87	null	null	null	null	78	null	null	null	null	86	85	null	null	null	null	null	null	null	null	null	null	null	null	null	null	105.1	null	null	null	null	null	null	64	75	null	null	null	null	null
post_bronchodilator_fev1_percent	null	null	72	null	null	45	94	null	84	73	null	null	null	null	89	null	null	null	null	84	82	null	null	null	null	null	null	null	null	null	null	null	null	null	null	107.25	87	null	null	null	null	null	56	86	null	null	null	null	null
pre_bronchodilator_fev1_fvc_percent	105	73	84	87	103	38	88	86	100	77	null	null	90	90	74	null	null	null	null	86	95	null	null	null	null	null	65	115	null	0.72	null	null	null	null	105	93.27	null	null	94	null	null	null	64	76	null	73	null	null	100
pre_bronchodilator_fev1_percent	97	null	68	106	104	40	87	87	85	64	null	null	100	74	84	null	null	null	null	79	74	null	null	null	null	null	64	102	null	92	null	null	null	null	97	104.64	79	null	100	null	null	null	52	88	null	74	null	null	91
primary_therapy_outcome_success	complete remission/response	complete remission/response	null	null	complete remission/response	complete remission/response	complete remission/response	null	progressive disease	complete remission/response	null	complete remission/response	complete remission/response	complete remission/response	null	progressive disease	stable disease	complete remission/response	complete remission/response	complete remission/response	complete remission/response	stable disease	complete remission/response	complete remission/response	complete remission/response	complete remission/response	complete remission/response	complete remission/response	progressive disease	complete remission/response	progressive disease	progressive disease	progressive disease	progressive disease	complete remission/response	complete remission/response	complete remission/response	complete remission/response	stable disease	complete remission/response	complete remission/response	null	complete remission/response	null	null	complete remission/response	complete remission/response	complete remission/response	complete remission/response
residual_tumor	null	r0	rx	r0	r0	r0	null	r0	r0	r0	r0	r0	null	null	null	null	r1	null	null	null	null	null	r0	r0	r0	null	r0	r0	null	r0	null	null	null	r0	null	null	r0	r0	r0	r0	r0	r0	r0	null	null	r0	r0	null	r0
tissue_prospective_collection_indicator	yes	yes	yes	yes	yes	yes	yes	yes	no	yes	yes	no	yes	no	yes	no	no	no	no	yes	no	null	no	no	yes	no	yes	yes	no	yes	no	no	no	no	yes	yes	yes	no	no	no	no	yes	no	no	no	no	yes	no	yes
tissue_retrospective_collection_indicator	no	no	no	no	no	no	no	no	yes	no	no	yes	no	yes	no	yes	yes	yes	yes	no	yes	null	yes	yes	no	yes	no	no	yes	no	yes	yes	yes	yes	no	no	no	yes	yes	yes	yes	no	yes	yes	yes	yes	no	yes	no
tobacco_smoking_history	3	4	4	2	3	3	3	2	3	4	2	3	3	4	1	3	4	2	1	4	4	3	4	2	3	3	2	4	null	1	1	4	1	4	3	3	4	4	4	4	1	4	4	3	4	4	1	null	3
ethnicity	not hispanic or latino	not hispanic or latino	hispanic or latino	not hispanic or latino	not hispanic or latino	not hispanic or latino	not hispanic or latino	hispanic or latino	not hispanic or latino	not hispanic or latino	not hispanic or latino	not hispanic or latino	not hispanic or latino	null	not hispanic or latino	not hispanic or latino	null	not hispanic or latino	null	not hispanic or latino	null	not hispanic or latino	null	not hispanic or latino	not hispanic or latino	not hispanic or latino	not hispanic or latino	not hispanic or latino	not hispanic or latino	not hispanic or latino	null	not hispanic or latino	not hispanic or latino	not hispanic or latino	not hispanic or latino	not hispanic or latino	not hispanic or latino	null	not hispanic or latino	null	null	not hispanic or latino	not hispanic or latino	not hispanic or latino	null	not hispanic or latino	not hispanic or latino	not hispanic or latino	not hispanic or latino
gender	female	male	female	female	female	male	male	male	female	female	male	female	female	male	female	female	female	male	female	male	female	female	female	male	female	male	female	female	male	female	female	male	male	female	female	female	female	female	male	female	male	male	female	female	male	female	female	female	female
race	white	white	white	white	white	black or african american	white	white	white	white	white	white	black or african american	black or african american	white	white	white	white	white	white	white	white	white	white	white	white	black or african american	black or african american	white	white	white	white	white	white	white	white	white	white	white	white	white	white	white	black or african american	white	white	white	white	white
tumor_stage	stage ia	stage ia	stage ib	stage ib	stage ia	stage iia	stage iib	stage ib	stage ia	stage iib	stage iiia	stage iiia	stage ia	stage ia	stage iiia	stage iiia	stage iiia	stage ib	stage ib	stage ib	stage ia	stage ib	stage iia	stage ib	stage ia	stage ib	stage ia	stage ib	stage iiia	stage ia	stage iib	stage iib	stage iia	stage ib	stage ia	stage ib	stage ia	stage ib	stage iiia	stage ib	stage ia	null	stage iiia	stage iiia	stage ib	stage ib	stage ib	stage ia	stage ia
cigarettes_per_day	null	5.47945	1.36986	0.876712	1.09589	5.09589	0.821918	1.64384	1.36986	3.12329	1.9726	null	0.273973	0.821918	null	null	null	null	null	1.26027	2.46575	1.36986	1.09589	null	2.73973	0.821918	2.52055	2.19178	null	null	null	null	null	2.19178	null	1.09589	1.91781	2.73973	2.19178	3.28767	null	null	2.73973	1.64384	null	1.36986	null	null	1.64384
years_smoked	4	null	50	null	20	31	null	null	20	38	null	null	10	30	null	null	null	null	null	15	45	null	null	null	25	null	null	40	null	null	null	null	null	null	4	20	35	null	40	40	null	null	null	30	null	null	null	null	30
sample_type	primary tumor	primary tumor	primary tumor	primary tumor	primary tumor	primary tumor	primary tumor	primary tumor	primary tumor	primary tumor	primary tumor	solid tissue normal	primary tumor	solid tissue normal	primary tumor	solid tissue normal	solid tissue normal	solid tissue normal	solid tissue normal	primary tumor	solid tissue normal	primary tumor	solid tissue normal	solid tissue normal	primary tumor	solid tissue normal	primary tumor	primary tumor	solid tissue normal	primary tumor	solid tissue normal	solid tissue normal	solid tissue normal	solid tissue normal	solid tissue normal	primary tumor	primary tumor	solid tissue normal	primary tumor	solid tissue normal	solid tissue normal	primary tumor	solid tissue normal	solid tissue normal	solid tissue normal	primary tumor	primary tumor	solid tissue normal	solid tissue normal
tumor_stage_simplified	stage 1	stage 1	stage 1	stage 1	stage 1	stage 2	stage 2	stage 1	stage 1	stage 2	stage 3	stage 3	stage 1	stage 1	stage 3	stage 3	stage 3	stage 1	stage 1	stage 1	stage 1	stage 1	stage 2	stage 1	stage 1	stage 1	stage 1	stage 1	stage 3	stage 1	stage 2	stage 2	stage 2	stage 1	stage 1	stage 1	stage 1	stage 1	stage 3	stage 1	stage 1	null	stage 3	stage 3	stage 1	stage 1	stage 1	stage 1	stage 1
os_event	0	0	0	0	0	0	0	1	0	0	1	1	0	0	0	1	1	0	0	0	0	0	0	1	0	1	0	0	1	0	1	1	1	1	0	0	0	0	0	0	0	0	0	0	0	1	0	1	0
os	845	608	705	1183	1036	565	728	97	1285	1367	444	1379	852	1864	805	189	464	310	3261	1429	2616	15	1683	1632	372	460	658	486	257	1079	995	118	176	434	845	545	476	1233	864	1400	2109	448	354	35	1239	1725	415	653	1324
expression	19.265	19.898	19.991	20.049	20.067	20.104	20.127	20.129	20.179	20.204	20.21	20.219	20.248	20.277	20.296	20.33	20.331	20.337	20.376	20.395	20.416	20.423	20.437	20.443	20.444	20.54	20.543	20.558	20.567	20.57	20.578	20.592	20.601	20.609	20.617	20.625	20.63	20.66	20.667	20.68	20.68	20.68	20.683	20.685	20.688	20.688	20.691	20.695	20.697
[truncated: 812 more columns]
